# Supplementary material for: Setting Dead at Zero: Applying Scale Properties to the QALY Model
Source: PubMed Central journal article supplement — Med Decis Making. 2018 Apr 9;38(6):627–34. doi: 10.1177/0272989X18765184 (PMC6587359; doi:10.1177/0272989x18765184), 2018-04-09
Supplement: DS_10.1177_0272989X18765184.pdf [file DS_10.1177_0272989X18765184.pdf]

## Appendix A: Search strategies per database

| Database                         | Basic search                                                                                                                                                                                                                                                                                                                                                                                                                                                  | Intermediate steps       | Final Search                                                                                                                                                                                                                                                                                                                                                                                                                                                                                                                                                                                                                                                                                                                                                                                                               |
|----------------------------------|---------------------------------------------------------------------------------------------------------------------------------------------------------------------------------------------------------------------------------------------------------------------------------------------------------------------------------------------------------------------------------------------------------------------------------------------------------------|--------------------------|----------------------------------------------------------------------------------------------------------------------------------------------------------------------------------------------------------------------------------------------------------------------------------------------------------------------------------------------------------------------------------------------------------------------------------------------------------------------------------------------------------------------------------------------------------------------------------------------------------------------------------------------------------------------------------------------------------------------------------------------------------------------------------------------------------------------------|
| <b>Pubmed</b>                    | -                                                                                                                                                                                                                                                                                                                                                                                                                                                             | -                        | (((((("Quality-Adjusted Life Years"[Mesh]) OR ((QALY[tiab] OR QALYs[tiab] OR Quality Adjusted Life Year[tiab] OR Quality Adjusted Life Years[tiab] OR QUALY[tiab] OR QUALYs[tiab]))) AND (("Visual Analog Scale"[Mesh]) OR ((Standard Gamble [tiab] OR SG[tiab] OR TTO [tiab] OR Time Trade off[tiab] OR Willingness to pay [tiab] OR WTP[tiab] OR Discrete choice [tiab] OR DCE[tiab] OR Visual Analogue Scale [tiab] OR VAS[tiab]))) AND (((("Quality-Adjusted Life Years"[Mesh]) OR ((QALY[tiab] OR QALYs[tiab] OR Quality Adjusted Life Year[tiab] OR Quality Adjusted Life Years[tiab] OR QUALY[tiab] OR QUALYs[tiab]))) AND ((Anchor*[tiab] OR Perfect health[tiab] OR best health imaginable[tiab] OR best imaginable health[tiab] OR Death[tiab] OR Dead[tiab] OR Scale[tiab] OR Ratio[tiab] OR Interval[tiab] ))) |
| Database                         | Basic search                                                                                                                                                                                                                                                                                                                                                                                                                                                  | Intermediate steps       | Final Search                                                                                                                                                                                                                                                                                                                                                                                                                                                                                                                                                                                                                                                                                                                                                                                                               |
| <b>Webofscience<br/>Cochrane</b> | 1: QALY OR QALYs OR "Quality Adjusted Life Year" OR "Quality Adjusted Life Years" OR QUALY OR QUALYs<br>2: "Standard Gamble" OR SG OR TTO OR "Time Trade off" OR "Willingness to pay" OR WTP OR "Discrete choice" OR DCE OR "Visual Analogue Scale" OR VAS<br>3: Anchor* OR "Perfect health" OR "best health imaginable" OR "best imaginable health" OR Death OR Dead OR Scale OR Ratio OR Interval OR "worst imaginable health" OR "worst health imaginable" | 4: 1 AND 2<br>5: 1 AND 3 | 4 OR 5                                                                                                                                                                                                                                                                                                                                                                                                                                                                                                                                                                                                                                                                                                                                                                                                                     |
| <b>Embase</b>                    | 1: quality adjusted life year/ OR QALY.ti,ab,kw. OR QALYs.ti,ab,kw. OR Quality Adjusted Life Year.ti,ab,kw. OR Quality Adjusted Life Years.ti,ab,kw. OR QUALY.ti,ab,kw. OR QUALYs.ti,ab,kw.<br>2: visual analog scale/ OR Standard Gamble.ti,ab,kw. OR SG.ti,ab,kw. OR TTO .ti,ab,kw. OR Time Trade off.ti,ab,kw. OR Willingness to                                                                                                                           |                          |                                                                                                                                                                                                                                                                                                                                                                                                                                                                                                                                                                                                                                                                                                                                                                                                                            |

|                  |                                                                                                                                                                                                                                                                                                                                                                                                                                                                                                                                                                                |  |  |
|------------------|--------------------------------------------------------------------------------------------------------------------------------------------------------------------------------------------------------------------------------------------------------------------------------------------------------------------------------------------------------------------------------------------------------------------------------------------------------------------------------------------------------------------------------------------------------------------------------|--|--|
|                  | <p>pay.ti,ab,kw. OR WTP.ti,ab,kw. OR Discrete choice.ti,ab,kw. OR DCE.ti,ab,kw. OR Visual Analogue Scale.ti,ab,kw. OR VAS.ti,ab,kw. 3: Anchor*.ti,ab,kw. OR Perfect health.ti,ab,kw. OR best health imaginable.ti,ab,kw. OR best imaginable health.ti,ab,kw. OR Death.ti,ab,kw. OR Dead.ti,ab,kw. OR Scale.ti,ab,kw. OR Interval.ti,ab,kw. OR Ratio.ti,ab,kw. OR worst imaginable health.ti,ab,kw.</p>                                                                                                                                                                         |  |  |
| <b>PsychINFO</b> | <p>1: QALY.ti,ab,id. OR QALYs.ti,ab,id. OR Quality Adjusted Life Year.ti,ab,id. OR Quality Adjusted Life Years.ti,ab,id. OR QUALY.ti,ab,id. OR QUALYs.ti,ab,id. 2: Standard Gamble.ti,ab,id. OR SG.ti,ab,id. OR TTO .ti,ab,id. OR Time Trade off.ti,ab,id. OR Willingness to pay.ti,ab,id. OR WTP.ti,ab,id. OR Discrete choice.ti,ab,id. OR DCE.ti,ab,id. OR Visual Analogue Scale.ti,ab,id. OR VAS.ti,ab,id. 3:Anchor*.ti,ab,id. OR Perfect health.ti,ab,id. OR best health imaginable.ti,ab,id. OR best imaginable health.ti,ab,id. OR Death.ti,ab,id. OR Dead.ti,ab,id.</p> |  |  |
| <b>Econlit</b>   | <p>1: QALY OR QALYs OR "Quality Adjusted Life Year" OR "Quality Adjusted Life Years" OR QUALY OR QUALYs<br/> 2: "Standard Gamble" OR SG OR TTO OR "Time Trade off" OR "Willingness to pay" OR WTP OR "Discrete choice" OR DCE OR "Visual Analogue Scale" OR VAS<br/> 3: Anchor* OR "Perfect health" OR "best health imaginable" OR "best imaginable health" OR Death OR Dead OR Scale OR Ratio OR Interval OR "worst imaginable health" OR "worst health imaginable"</p>                                                                                                       |  |  |
